# Supplementary material for: Supported metallocene catalysis as an efficient tool for the preparation of polyethylene/carbon nanotube nanocomposites: effect of the catalytic system on the coating morphology
Source: Royal Society of Chemistry journal article supplement (doi:10.1039/b701764b), 2007-01-01
Supplement: b701764b.pdf [file b701764b.pdf]

# Supported Metallocene Catalysis as an Efficient Tool for the Preparation of Polyethylene/Carbon Nanotubes Nanocomposites: Effect of the Catalytic System on the Coating Morphology

By Daniel Bonduel et al.

## Electronic supplementary information

*X-Ray photoelectron spectroscopy (XPS) (Thermo VG scientific, VG ESCALAB 220iXL), analysis of neat MWNTs, MAO-treated MWNTs, and MAO/Cp\*<sub>2</sub>ZrCl<sub>2</sub>-treated MWNTs*

Neat MWNTs

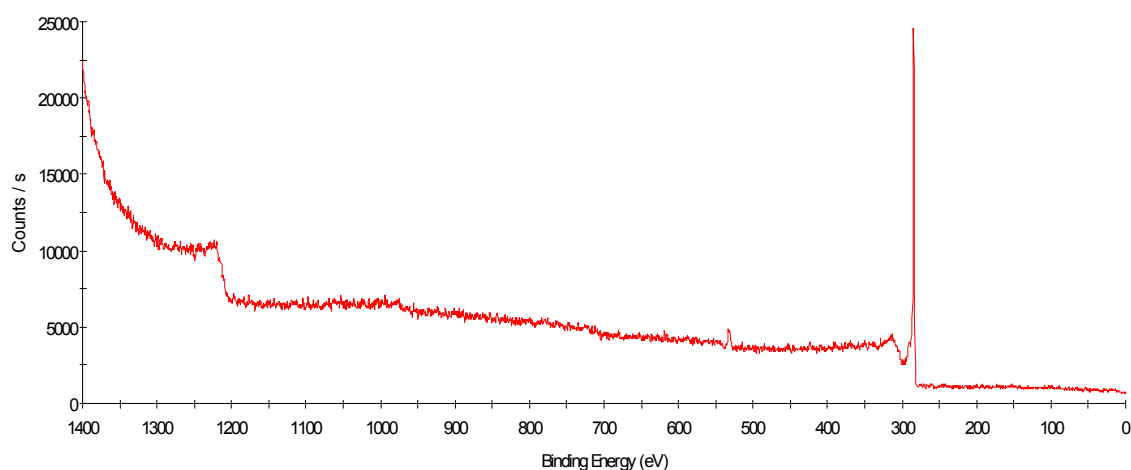

| Name | Centre BE | At. % |  |
|------|-----------|-------|--|
| O1s  | 532.60    | 2.19  |  |
| C1s  | 284.30    | 97.81 |  |

### MAO-treated MWNTs

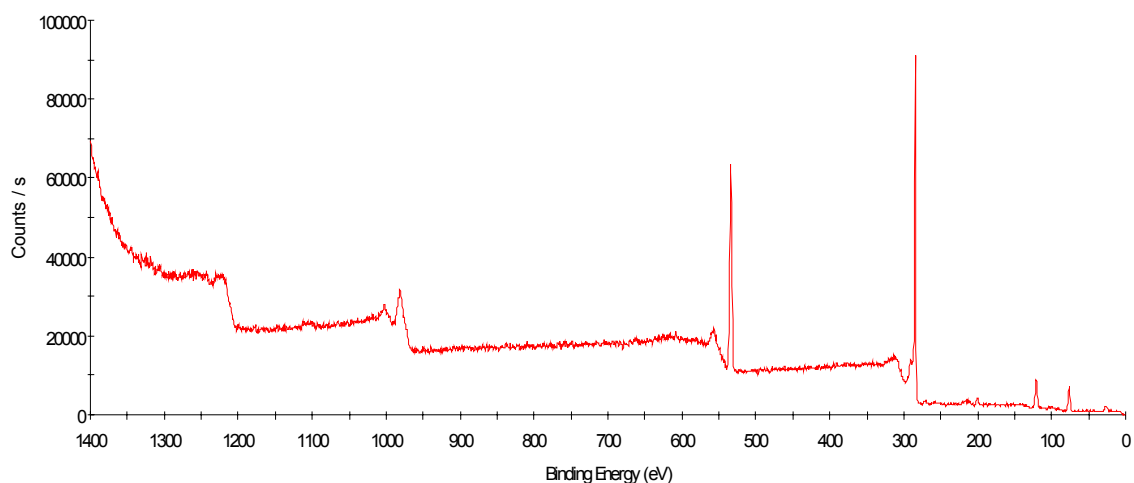

| Name | Centre BE | At. % |  |
|------|-----------|-------|--|
| O1s  | 534.00    | 22.58 |  |
| Cl2p | 200.30    | 0.78  |  |
| C1s  | 284.40    | 66.17 |  |
| Al2p | 76.33     | 10.47 |  |

### MAO/Cp\*<sub>2</sub>ZrCl<sub>2</sub>-treated MWNTs

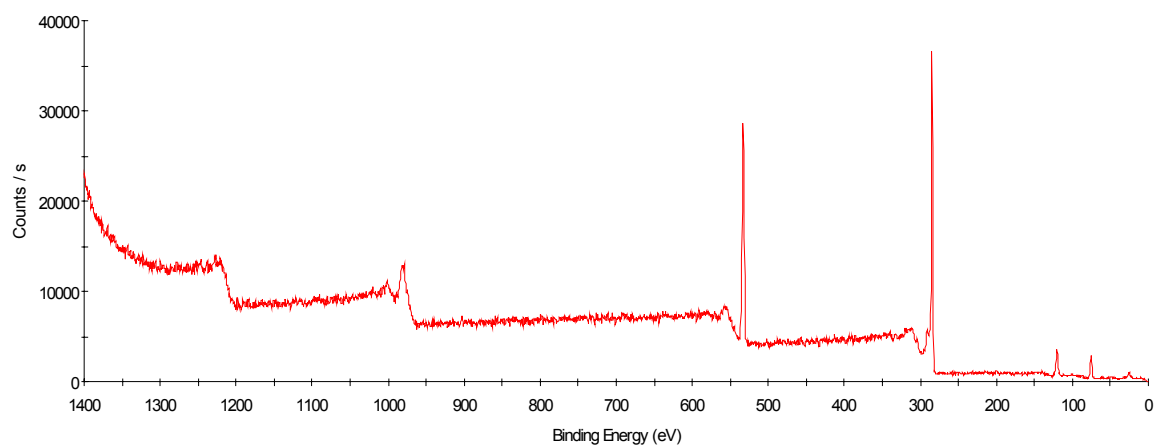

| Name | Centre BE | At. % |  |
|------|-----------|-------|--|
| O1s  | 533.30    | 21.34 |  |
| Al2p | 75.50     | 10.51 |  |
| C1s  | 284.40    | 68.15 |  |
